# Supplementary material
Source: PubMed Central journal article supplement (PMC3111314)
Supplement: 1106742108_pnas.201106742SI.pdf [file 1106742108_pnas.201106742SI.pdf]

# Supporting Information

Hedtke et al. 10.1073/pnas.1106742108

## SI Materials and Methods

**Primer Development.** To identify nuclear markers appropriate for phylogenetic analysis, we tested a candidate set of “universal” primers for single-copy loci (1). Primers were additionally developed using an  $\alpha$ -amylase gene (*amy*) sequence from *Corbicula* (GenBank accession no. AF468016). Primer pairs were tested on DNA from North America using PCR annealing temperatures ranging from 44 °C to 56 °C; PCR products were then separated on an ethidium-bromide stained agarose gel. Primer pairs that produced consistent products were optimized by varying temperature and concentration of magnesium chloride and/or BSA. Successful amplifications were cleaned using a Viogene Gel-M gel extraction kit (Viogene Biotek) and sequenced using an Applied Biosystems 3100 automated sequencer. On the basis of initial sequences of products amplified using a primer pair for an intron of the  $\alpha$ -subunit of adenosine triphosphate synthase (*atps- $\alpha$* ) (1), additional primers were designed and tested. From 5' to 3', the primer sequences for the markers used in this study are as follows: AmyE3c-f: ACA TGG TGC AAC GAT GC; AmyE4a-r: TGA TAA CCA CAT CTA CCA AG; ATPSaSH1f: GTG CCC ATY GGW AGA GGA CAG AGA G; and ATPSaSH4r: TGA TGG TGT CAA TAG CAA TGG CAG T.

Reaction conditions were as follows: 2.5  $\mu$ L Thermopol 10x buffer with MgCl<sub>2</sub> (NEB), 2.5  $\mu$ L 25 mM dNTPs, 0.75  $\mu$ L each 10 mM primer, 1  $\mu$ L BSA (*amy* only), 0.2  $\mu$ L NEB Taq polymerase, and 3–5  $\mu$ L DNA extract, brought to a total volume of 25  $\mu$ L with double-distilled water. PCR conditions were as follows: 94 °C 1:30 min, 35 cycles 94 °C 1 min, 46 °C (*amy*)/52 °C (*atps- $\alpha$* ) 1 min, 72 °C 2 min, and 72 °C 5 min. To sequence individual alleles, we cloned PCR products using the Invitrogen TOPO TA Cloning kit with pCR 2.1-TOPO vector (Invitrogen Life Technologies) and sequenced the amplified product from individual clones.

**Testing for Recombinant Sequences.** During PCR, recombination can occur between alleles of an individual and confound phylogenetic analysis (2). We used the program RDPv3.26 (3) to test all sequences for possible PCR-mediated recombination within individual PCR products using the following implemented methods: RDP, GENECONV, Bootscan/Recscan, MaxChi, Chimaera,

SiScan, and 3seq (4–10). In no case was recombination inferred between sequences found in an individual, suggesting that PCR-mediated recombination was absent or minimal in these data sets.

**Phylogenetic Analyses.** The model of evolution for alignments was determined under the Akaike Information Criterion (AIC) using ModelTest v3.7 (11) for maximum likelihood analyses, and MrModelTest v2.3 (12) for Bayesian analyses, using the correction for sample size (i.e., the AICc), with the number of bases in the alignment being the sample size.

We estimated the maximum likelihood estimate (MLE) for all trees using GARLI v0.96 (13), performing 20 search replicates for each alignment. We ran 1,000 nonparametric bootstrap replicates using GARLI under the same search settings as those used to determine the MLE. For Bayesian phylogenetic analysis, we performed four replicate runs with four chains each using MrBayes v.3.1.2 (14). We set the exponential rate parameter for the distribution of the prior probability on branch length to 0.01 rather than the default of 0.1, because the default branch length prior in MrBayes can lead to branch lengths 10 to >100 times larger than the MLE estimate if distances between sequences are expected to be small (15). Each run continued for 5,000,000 generations and was sampled every 1,000 trees and parameters. We assessed convergence using MrConverge (as described in ref. 16) and discarded all tree and parameters sample before convergence as burn-in. We used FigTree v1.1 (17) to visualize trees and create initial graphics files.

**Hypothesis Testing.** The posterior probability of alternative hypotheses was determined by filtering the postconvergence Bayesian posterior sample using backbone constraints in PAUP\* v.4b (18). Because topologies are sampled in proportion to their posterior probability once stationarity has been reached, the proportion of trees within the post burn-in sample that matches a given constraint tree represents the probability of that topology. For each of the three genes, we tested the monophyly of alleles within each androgenetic individual, the monophyly of all alleles from all androgenetic taxa, support for individual bipartitions, and pairwise relationships between sexual taxa.

- Jarman SN, Ward RD, Elliott NG (2002) Oligonucleotide primers for PCR amplification of coelomate introns. *Mar Biotechnol (NY)* 4:347–355.
- Bradley RD, Hillis DM (1997) Recombinant DNA sequences generated by PCR amplification. *Mol Biol Evol* 14:592–593.
- Martin DP, Williamson C, Posada D (2005) RDP2: Recombination detection and analysis from sequence alignments. *Bioinformatics* 21:260–262.
- Smith JM (1992) Analyzing the mosaic structure of genes. *J Mol Evol* 34:126–129.
- Padidam M, Sawyer S, Fauquet CM (1999) Possible emergence of new geminiviruses by frequent recombination. *Virology* 265:218–225.
- Gibbs MJ, Armstrong JS, Gibbs AJ (2000) Sister-scanning: A Monte Carlo procedure for assessing signals in recombinant sequences. *Bioinformatics* 16:573–582.
- Martin D, Rybicki E (2000) RDP: Detection of recombination amongst aligned sequences. *Bioinformatics* 16:562–563.
- Posada D, Crandall KA (2001) Evaluation of methods for detecting recombination from DNA sequences: Computer simulations. *Proc Natl Acad Sci USA* 98:13757–13762.
- Martin DP, Posada D, Crandall KA, Williamson C (2005) A modified bootscan algorithm for automated identification of recombinant sequences and recombination breakpoints. *AIDS Res Hum Retroviruses* 21:98–102.
- Boni MF, Posada D, Feldman MW (2007) An exact nonparametric method for inferring mosaic structure in sequence triplets. *Genetics* 176:1035–1047.
- Posada D, Crandall KA (1998) MODELTEST: Testing the model of DNA substitution. *Bioinformatics* 14:817–818.
- Nylander JAA (2004) *MrModelTest v2*. (Evolutionary Biology Centre, Uppsala University, Uppsala, Sweden).
- Zwickl DJ (2006) Genetic algorithm approaches for the phylogenetic analysis of large biological sequence data sets under the maximum likelihood criterion. Ph.D. dissertation (University of Texas at Austin, TX).
- Ronquist F, Huelsenbeck JP (2003) MrBayes 3: Bayesian phylogenetic inference under mixed models. *Bioinformatics* 19:1572–1574.
- Brown JM, Hedtke SM, Lemmon AR, Lemmon EM (2010) When trees grow too long: Investigating the causes of highly inaccurate bayesian branch-length estimates. *Syst Biol* 59:145–161.
- Brown JM, Hedtke SM, Lemmon AR (2007) The importance of data partitioning and the utility of Bayes factors in Bayesian phylogenetics. *Syst Biol* 56:643–655.
- Rambaut A (2006) *FigTree v1.2.2* (Institute of Evolutionary Biology, Univ of Edinburgh, UK).
- Swofford DL (2002) *PAUP\*: Phylogenetic Analysis Using Parsimony (\*and other methods)*. Version 4 (Sinauer Associates, Sunderland, MA).

**Table S1. Posterior probabilities of monophyletic groups in three different gene trees of *Corbicula***

| Bipartition or clade tested                                                                     | <i>cox-1</i> | <i>amy</i> | <i>atps-α</i> |
|-------------------------------------------------------------------------------------------------|--------------|------------|---------------|
| Monophyly of androgenetic individuals                                                           |              |            |               |
| <i>C. sp. A</i>                                                                                 | n/a          | 0.14       | 0.53          |
| <i>C. sp. B</i>                                                                                 | n/a          | 0.01       | 0.20          |
| <i>C. sp. C</i>                                                                                 | n/a          | 0          | 0.0           |
| <i>C. fluminea</i> Korea                                                                        | n/a          | 0          | 0.14          |
| <i>C. fluminea</i> Thailand                                                                     | n/a          | 0          | 0.13          |
| <i>C. fluminea</i> Taiwan                                                                       | n/a          | 0.01       | 0.05          |
| <i>C. fluminea</i> Philippines                                                                  | n/a          | n/a        | 0.53          |
| Monophyly of all androgenetic individuals                                                       | 0.03         | 0          | 0             |
| Posterior probability of sexual taxa being sister                                               |              |            |               |
| ( <i>C. loehensis</i> , <i>C. matannensis</i> )                                                 | 0.97         | 0.99       | 0             |
| ( <i>C. loehensis</i> , <i>C. moltkiana</i> )                                                   | 0.02         | 0          | 0.33          |
| ( <i>C. madagascariensis</i> , <i>C. moltkiana</i> )                                            | 0.71         | 0          | n/a           |
| ( <i>C. matannensis</i> , <i>C. sandai</i> )                                                    | 0.01         | 0          | 0.99          |
| ( <i>C. moltkiana</i> , <i>C. sandai</i> )                                                      | 0.21         | 0          | 0             |
| Posterior probability of sexual taxa being closest sexual relatives, removing androgenetic taxa |              |            |               |
| ( <i>C. loehensis</i> , <i>C. matannensis</i> )                                                 | 0.97         | 0.99       | 0             |
| ( <i>C. loehensis</i> , <i>C. moltkiana</i> )                                                   | 0.02         | 0          | 0.99          |
| ( <i>C. madagascariensis</i> , <i>C. moltkiana</i> )                                            | 0.76         | 0          | n/a           |
| ( <i>C. matannensis</i> , <i>C. sandai</i> )                                                    | 0.01         | 0          | 0.99          |
| ( <i>C. moltkiana</i> , <i>C. sandai</i> )                                                      | 0.21         | 0.99       | 0             |
